# Supplementary material
Source: HighWire-hosted journal article supplement (https://jnis.bmj.com/content/12/11/1099)
Supplement: inline-supplementary-material-1 [file inline-supplementary-material-1.pdf]

## Supplemental material

### Direct Aspiration Stroke Thrombectomy: a comprehensive review

**Supplemental Table 1:** Baseline characteristics of studies in patients with AC-LVO treated with DA or SR or both treatments as first-line device

| Ref            | Study design        | Study period                 | Number of patients                   | Differences in baseline characteristics ?                 | Inclusion criteria                   |
|----------------|---------------------|------------------------------|--------------------------------------|-----------------------------------------------------------|--------------------------------------|
| Lapergue, 2016 | PR, RE              | November 2012 – June 2014    | DA : 124<br>SR : 119<br>Total = 243  | Yes (IV tPA)                                              | Arterial puncture < 6h               |
| Lapergue 2017  | RCT                 | October 2015 – October 2016  | DA : 192<br>SR : 189<br>Total = 381  | No                                                        | Arterial puncture < 6h               |
| Stapleton 2018 | Retrospective study | June 2012 – October 2015     | DA : 47<br>SR : 70<br>Total = 117    | Yes (age)                                                 | Arterial puncture < 8h               |
| Benson 2018    | PR, RE              | March 2014 – June 2015       | DA : 207<br>SR : 968<br>Total = 1175 | Yes (pre stroke mRS and level of occlusion)               | Arterial puncture < 6.5h             |
| Martini 2019   | Retrospective study | 2015 – 2016                  | DA : 107<br>SR : 121<br>Total = 228  | Yes (pre stroke mRS and stroke onset to hospital arrival) | NA                                   |
| Kang 2019      | Retrospective study | January 2011 – December 2015 | DA : 429<br>SR : 526<br>Total = 955  | Yes (stroke onset to puncture)                            | NIHSS > 4<br>Arterial puncture < 10h |

|               |                     |                               |                                                      |                                                 |                                          |
|---------------|---------------------|-------------------------------|------------------------------------------------------|-------------------------------------------------|------------------------------------------|
| Turk 2019     | RCT                 | June 2015 – July 2017         | DA : 134<br>SR : 136<br>Total = 270                  | No                                              | Arterial puncture < 6h<br>and ASPECT > 6 |
| Turk, 2014    | Retrospective study | May 2008 – October 2012       | DA + SR : 144<br>SR : 27<br>Total = 171              | NA                                              | NA                                       |
| Delgado 2015  | PR, RE              | March 2012 – June 2015        | DA : 45<br>DA + SR : 55<br>Total = 100               | Yes (NIHSS score, ASPECT and thrombus location) | NIHSS > 6 and ASPECT > 6                 |
| Hesse 2017    | PR, RE              | 2013 - 2016                   | DA : 164<br>SR : 102<br>DA + SR : 184<br>Total = 450 | No                                              | NA                                       |
| Nogueira 2018 | RCT                 | May 2012 – November 2015      | DA : 100<br>DA + SR : 98<br>Total = 198              | No                                              | Arterial puncture < 8h                   |
| Brehm 2019    | PR, RE              | January 2014 – September 2017 | DA : 72<br>DA + SR : 99<br>Total = 171               | No                                              | NA                                       |

ASPECT: Alberta Stroke Programme Early CT; DA: distal aspiration; mRS: modified Rankin scale; NA: not available; NIHSS: National Institutes of Health Stroke Scale; PR: prospective registry; RCT: randomized controlled trial; RE: retrospective analysis; SR: stent retriever; IV tPA: intravenous tissue plasminogen activator
